# Supplementary material
Source: PubMed Central journal article supplement (PMC3571347)
Supplement: MCB.01226-12_zmb999109848so1.pdf [file MCB.01226-12_zmb999109848so1.pdf]

Supplemental Tables for

14-3-3 (Bmh) proteins regulate combinatorial transcription following RNA Pol II recruitment by binding at Adr1-dependent promoters in *Saccharomyces cerevisiae*

Katherine A. Braun, Pabitra K. Parua, Kenneth M. Dombek, Gregory E. Miner, and  
Elton T. Young#

From the Department of Biochemistry  
University of Washington  
Seattle, WA 98195-7350, USA

Running title:  
Bmh inhibits promoter-bound Adr1

Supplemental Table 1. Oligos used in RT-qPCR and ChIP qPCR.

| Gene             | Position <sup>a</sup> | Oligo        | Sequence                    |
|------------------|-----------------------|--------------|-----------------------------|
| ACS1 promoter    | -242                  | ACS1-C       | CACTCACCTGTTGACATGCC        |
|                  |                       | ACS1-B       | TATTTGCCACCGAGGAACTGT       |
| ACS1             | +2014/2142            | KB36-ACS1.f  | ATCAAGAAGCATTGTTGCTTTACTG   |
|                  |                       | KB37-ACS1.r  | TGCCAGGGTTTGACAATGTAG       |
| ACT1             | +916/2437             | KB15-ACT1.f2 | TCCCCAGGTATTGCCGAAAG        |
|                  |                       | KB16-ACT1.r2 | CCAATCCAGACGGAGTACTTTC      |
| ADH2 promoter    | -235                  | ADH2pQ1      | ACCATCCACTTCACGAGACTGA      |
|                  |                       | ADH2pL       | AAAAGTCGCTACTGGCACTC        |
| ADH2             | +741/1047             | LL5-ADH2QA   | GTTAGCGCAGTCGTTAAGGC        |
|                  |                       | LL6-ADH2QB   | CAGTACCGTTCCGCCCTACAG       |
| FBP1 promoter    | -452                  | CTO FBP1 A   | ACCCATCAAACCTGCATGGTCC      |
|                  |                       | CTO FBP1 B   | TTGGCTCTTACGCCCTTAAC        |
| FBP1             | +760/1047             | LL11-FBP1QA  | ACCCTCTACTGGAACGAGACTATAAG  |
|                  |                       | LL12-FBP1QB  | TCTTCTTGTCGCAAGGGTATG       |
| GAL1-10 promoter | -408                  | KB1-GAL1.f1  | TGTTCCGGAGCAGTGC GGCCG      |
|                  |                       | KB2-GAL1.r1  | ACGCTTAACTGCTCATTGCT        |
| GAL1             | +1233/1587            | KB9-GAL1.f2  | CGTTCATCAAGGCACCAAAT        |
|                  |                       | KB10-GAL1.r2 | TCAGAGGGCTAAGCATGTGT        |
| GAL7 promoter    | -305                  | KB3-GAL7.f1  | TTTTTCCCCTTTATTTTGTTC       |
|                  |                       | KB4-GAL7.r1  | GCTCAACAGTGCTCCGAAGT        |
| GAL7             | +865/1101             | KB13-GAL7.f2 | GGACCTCGCCTCGATTTTA         |
|                  |                       | KB14-GAL7.r2 | AATTCATCACCAGTCGCATTC       |
| POX1 promoter    | -196                  | POX1-CQF     | TAAACTCCGAAGCGAAAGGA        |
|                  |                       | POX1-CQR     | TGAGCGGAATGAGGAAAAC         |
| POX1             | +2031/2247            | GL189        | GCCAATTGTGAGGAAAGACTGTATAG  |
|                  |                       | GL190        | TGTGATAGATATCGCCATCAAAGTAAC |
| TEL-VI-R         |                       | tel55        | GCGTAACAAAGCCATAATGCCTCC    |
|                  |                       | tel56        | CTCGTTAGGATCACGTTTCAATCC    |

<sup>a</sup> The position represents the midpoint of the qPCR product and the numbers listed are relative to the ATG of the gene listed. Those products that are within the ORF are listed with the position of the product followed by the total length of the ORF.

Supplemental Table 2. Data for additional genes or stains assayed in experiments shown in Figures 1, 2, 4 and 6.

A. Presence of Bmh-binding domain in GBD-Adr1 does not affect promoter binding.

**GBD-ChIP**

| Gene           | GBD-Adr1 | Promoter/<br>TEL-VI-R | <i>BMH1</i> | <i>bmh1-ts</i> |
|----------------|----------|-----------------------|-------------|----------------|
| <i>GAL1-10</i> | 215-260  | RATIO                 | 22          | 12             |
|                |          | STDEV                 | 7.9         | 7.2            |
|                | 255-420  | RATIO                 | 65          | 13             |
|                |          | STDEV                 | 5.6         | 1.7            |
| <i>GAL7</i>    | 215-260  | RATIO                 | 54          | 200            |
|                |          | STDEV                 | 30          | 106            |
|                | 255-420  | RATIO                 | 39          | 40             |
|                |          | STDEV                 | 46          | 36             |

**RT-qPCR**

| Gene        | GBD-Adr1 | mRNA/<br><i>ACT1</i> | <i>BMH1</i> | <i>bmh1-ts</i> |
|-------------|----------|----------------------|-------------|----------------|
| <i>GAL1</i> | 215-260  | RATIO                | 0.0036      | 0.0072         |
|             |          | STDEV                | 0.0013      | 0.0016         |
|             | 255-420  | RATIO                | 0.78        | 1.0            |
|             |          | STDEV                | 0.081       | 0.23           |
| <i>GAL7</i> | 215-260  | RATIO                | 0.0084      | 0.051          |
|             |          | STDEV                | 0.0065      | 0.0082         |
|             | 255-420  | RATIO                | 4.5         | 9.4            |
|             |          | STDEV                | 0.83        | 1.3            |

B. Loss of Bmh1 activity in *hdacΔ* mutants has differing effects on glucose-repressed genes.

**RT-qPCR; Repressed**

| Gene        | mRNA/<br><i>ACT1</i> | WT<br>( <i>bmh2</i> ) | <i>bmh1-ts</i><br><i>bmh2</i> | <i>hda1 rpd3</i> | <i>bmh1-ts</i><br><i>bmh2 hda1</i><br><i>rpd3</i> | <i>bmh1-ts</i><br><i>bmh2 rpd3</i> | <i>bmh1-ts</i><br><i>bmh2 hda1</i> | <i>bmh2 hda1</i><br><i>rpd3</i> |
|-------------|----------------------|-----------------------|-------------------------------|------------------|---------------------------------------------------|------------------------------------|------------------------------------|---------------------------------|
| <i>ACS1</i> | RATIO                | 0.00016               | 0.00021                       | 0.0013           | 0.0083                                            | 0.0040                             | 0.00030                            | 0.00067                         |
|             | STDEV                | 0.00015               | 6.3E-05                       | 0.00048          | 0.0061                                            | 0.0012                             | 7.0E-05                            | 0.00053                         |
| <i>ADH2</i> | RATIO                | 0.0075                | 0.11                          | 0.024            | 0.62                                              | 0.29                               | 0.081                              | 0.020                           |
|             | STDEV                | 0.00014               | 0.011                         | 0.0076           | 0.056                                             | 0.02                               | 0.021                              | 1.5E-03                         |
| <i>ADY2</i> | RATIO                | 0.0022                | 0.0028                        | 0.019            | 0.074                                             | 0.011                              | 0.0037                             | 0.023                           |
|             | STDEV                | 0.00045               | 0.00074                       | 0.0014           | 0.018                                             | 0.00025                            | 0.00089                            | 0.00013                         |
| <i>CIT3</i> | RATIO                | 0.0017                | 0.0016                        | 0.0035           | 0.0069                                            |                                    |                                    |                                 |
|             | STDEV                | 4.4E-05               | 0.00081                       | 0.00063          | 0.00096                                           |                                    |                                    |                                 |
| <i>CTA1</i> | RATIO                | 0.0015                | 0.00077                       | 0.0027           | 0.0038                                            | 0.0015                             | 0.00065                            | 0.0016                          |
|             | STDEV                | 0.00022               | 3.8E-05                       | 0.00057          | 1.2E-05                                           | 0.00052                            | 4.2E-06                            | 4.1E-05                         |
| <i>FBP1</i> | RATIO                | 0.0012                | 0.00093                       | 0.0046           | 0.0048                                            | 0.0013                             | 0.00083                            | 0.0025                          |

|             |       |         |         |         |         |         |         |         |
|-------------|-------|---------|---------|---------|---------|---------|---------|---------|
|             | STDEV | 0.00015 | 0.00050 | 0.00075 | 0.0011  | 0.00032 | 3.2E-05 | 0.00014 |
| <b>FOX2</b> | RATIO | 0.0054  | 0.0030  | 0.015   | 0.011   | 0.010   | 0.0024  | 0.011   |
|             | STDEV | 0.00041 | 0.00077 | 0.0029  | 0.00014 | 0.00036 | 3.6E-05 | 0.0027  |
| <b>ICL1</b> | RATIO | 0.019   | 0.0098  | 0.055   | 0.034   | 0.013   | 0.010   | 0.020   |
|             | STDEV | 0.0020  | 0.00017 | 0.0070  | 0.0041  | 0.0025  | 0.00052 | 0.0023  |
| <b>ICL2</b> | RATIO | 0.025   | 0.023   | 0.062   | 0.071   |         |         |         |
|             | STDEV | 0.0069  | 0.0058  | 0.00022 | 0.0052  |         |         |         |
| <b>MLS1</b> | RATIO | 0.00051 | 0.00026 | 0.0010  | 0.0023  | 0.00069 | 0.00043 | 0.00070 |
|             | STDEV | 7.3E-05 | 3.4E-05 | 0.0013  | 0.00039 | 0.00082 | 0.00012 | 1.3E-05 |
| <b>POX1</b> | RATIO | 0.00091 | 0.0010  | 0.0019  | 0.0025  | 0.0024  | 0.00059 | 0.0014  |
|             | STDEV | 7.6E-05 | 0.00021 | 0.00067 | 0.00018 | 0.00016 | 6.2E-06 | 7.1E-05 |

C. Adr1, not Cat8, is required for activation of Adr1-dependent genes in the *bmh hdac* strain.

RT-qPCR; Repressed

| Gene        | <i>ADR1 CAT8</i> genotype | mRNA/ <i>ACT1</i> | WT      | <i>bmh1-ts bmh2</i> | <i>had1 rpd3</i> | <i>bmh1-ts bmh2 had1 rpd3</i> |
|-------------|---------------------------|-------------------|---------|---------------------|------------------|-------------------------------|
| <b>ACS1</b> | <i>ADR1 CAT8</i>          | RATIO             | 0.0096  | 0.014               | 0.068            | 0.21                          |
|             |                           | STDEV             | 0.0030  | 0.0030              | 0.023            | 0.024                         |
|             | <i>adr1 CAT8</i>          | RATIO             | 0.013   | 0.013               | 0.047            | 0.090                         |
|             |                           | STDEV             | 0.0030  | 0.0021              | 0.0024           | 0.0077                        |
|             | <i>ADR1 cat8</i>          | RATIO             | 0.0060  | 0.017               | 0.094            | 0.30                          |
|             |                           | STDEV             | 0.0012  | 0.00067             | 0.0076           | 0.049                         |
| <b>FBP1</b> | <i>ADR1 CAT8</i>          | RATIO             | 0.0018  | 0.0024              | 0.0090           | 0.0076                        |
|             |                           | STDEV             | 0.00011 | 0.00068             | 0.0023           | 0.0020                        |
|             | <i>adr1 CAT8</i>          | RATIO             | 0.0017  | 0.0025              | 0.0052           | 0.011                         |
|             |                           | STDEV             | 0.00020 | 0.00059             | 0.0012           | 0.00066                       |
|             | <i>ADR1 cat8</i>          | RATIO             | 0.0013  | 0.0021              | 0.0060           | 0.0046                        |
|             |                           | STDEV             | 0.00060 | 0.00051             | 0.00046          | 0.00058                       |
| <b>FOX2</b> | <i>ADR1 CAT8</i>          | RATIO             | 0.0050  | 0.0046              | 0.015            | 0.015                         |
|             |                           | STDEV             | 0.00075 | 0.00038             | 0.0018           | 0.0026                        |
|             | <i>adr1 CAT8</i>          | RATIO             | 0.0018  | 0.0011              | 0.0028           | 0.0026                        |
|             |                           | STDEV             | 0.00022 | 5.9E-05             | 0.00030          | 0.00040                       |
|             | <i>ADR1 cat8</i>          | RATIO             | 0.0029  | 0.0027              | 0.0081           | 0.014                         |
|             |                           | STDEV             | 0.0016  | 0.00043             | 0.0011           | 0.0032                        |

D. Adr1<sup>C</sup> (S230A) does not enhance transcription in a *bmh hdac* strain.

RT-qPCR; Repressed

| Gene        | <i>ADR1</i> plasmid | mRNA/ <i>ACT1</i> | <i>adr1</i> | <i>adr1 bmh1-ts bmh2</i> | <i>adr1 had1 rpd3</i> | <i>adr1 bmh1-ts bmh2 had1 rpd3</i> |
|-------------|---------------------|-------------------|-------------|--------------------------|-----------------------|------------------------------------|
| <b>ACS1</b> | <i>ADR1</i>         | RATIO             | 0.024       | 0.024                    | 0.13                  | 0.63                               |

|             |                         |       |         |         |        |        |
|-------------|-------------------------|-------|---------|---------|--------|--------|
|             | <i>ADR1<sup>c</sup></i> | STDEV | 0.014   | 0.0031  | 0.013  | 0.096  |
|             |                         | RATIO | 0.019   | 0.042   | 0.28   | 0.79   |
|             |                         | STDEV | 0.0019  | 0.0092  | 0.036  | 0.099  |
| <i>ADY2</i> | <i>ADR1</i>             | RATIO | 0.0026  | 0.0031  | 0.035  | 0.097  |
|             |                         | STDEV | 0.00076 | 0.00081 | 0.0064 | 0.012  |
|             | <i>ADR1<sup>c</sup></i> | RATIO | 0.0043  | 0.0051  | 0.079  | 0.14   |
|             |                         | STDEV | 0.0012  | 0.0017  | 0.0072 | 0.029  |
| <i>FBP1</i> | <i>ADR1</i>             | RATIO | 0.0050  | 0.0074  | 0.017  | 0.024  |
|             |                         | STDEV | 0.00053 | 0.00081 | 0.0046 | 0.0046 |
|             | <i>ADR1<sup>c</sup></i> | RATIO | 0.0052  | 0.0069  | 0.018  | 0.023  |
|             |                         | STDEV | 0.00061 | 0.0018  | 0.0044 | 0.0033 |
| <i>FOX2</i> | <i>ADR1</i>             | RATIO | 0.0032  | 0.0024  | 0.0066 | 0.014  |
|             |                         | STDEV | 0.00038 | 0.00041 | 0.0033 | 0.0047 |
|             | <i>ADR1<sup>c</sup></i> | RATIO | 0.0035  | 0.0033  | 0.010  | 0.018  |
|             |                         | STDEV | 0.00021 | 0.0015  | 0.0030 | 0.0059 |

E. *Cat8* is not required for transcription of *Adr1*-dependent genes in the absence of *Bmh* activity.

RT-qPCR; Derepressed

| Gene        | % WT expression relative to <i>ACT1</i> | WT  | <i>bmh1-ts bmh2</i> | <i>cat8</i> | <i>bmh1-ts bmh2 cat8</i> |
|-------------|-----------------------------------------|-----|---------------------|-------------|--------------------------|
| <i>ADY2</i> | RATIO                                   | 100 | 530                 | 110         | 820                      |
|             | STDEV                                   | 4   | 22                  | 20          | 120                      |
| <i>ATO3</i> | RATIO                                   | 100 | 1300                | 47          | 360                      |
|             | STDEV                                   | 4   | 200                 | 8.3         | 63                       |
| <i>FDH</i>  | RATIO                                   | 100 | 1000                | 69          | 390                      |
|             | STDEV                                   | 14  | 180                 | 12          | 19                       |
| <i>ICL1</i> | RATIO                                   | 100 | 52                  | 1.1         | 1.4                      |
|             | STDEV                                   | 4   | 4.6                 | 0.1         | 0.65                     |
| <i>ICL2</i> | RATIO                                   | 100 | 120                 | 48          | 420                      |
|             | STDEV                                   | 10  | 30                  | 6           | 52                       |
| <i>JEN1</i> | RATIO                                   | 100 | 220                 | 15          | 84                       |
|             | STDEV                                   | 5   | 15                  | 1           | 8.5                      |
| <i>POX1</i> | RATIO                                   | 100 | 400                 | 70          | 1300                     |
|             | STDEV                                   | 21  | 64                  | 8.5         | 180                      |

Supplementary Table 3. *CAT8*-dependence of gene expression.

| <b><i>CAT8</i><br/>Genotype</b>                     | <b><i>ADR1</i></b> | <b>R</b> | <b>DR</b> | <b><i>cat8Δ/CAT8</i> (%)<br/>(DR)</b> |
|-----------------------------------------------------|--------------------|----------|-----------|---------------------------------------|
| <b>Directly <i>Cat8</i>-, <i>Adr1</i>-dependent</b> |                    |          |           |                                       |
| <b>ACS1</b>                                         |                    |          |           |                                       |
| wt                                                  | ADR1-wt            | 1.1      | 280       | 3.3                                   |
| cat8Δ                                               | ADR1-wt            | 1.0      | 9.2       |                                       |
| wt                                                  | ADR1 <sup>c</sup>  | 2.2      | 360       | 42                                    |
| cat8Δ                                               | ADR1 <sup>c</sup>  | 1.7      | 150       |                                       |
| <b>ADH2</b>                                         |                    |          |           |                                       |
| wt                                                  | ADR1-wt            | 1.0      | 1200      | 1.0                                   |
| cat8Δ                                               | ADR1-wt            | 1.0      | 12        |                                       |
| wt                                                  | ADR1 <sup>c</sup>  | 20       | 1600      | 75                                    |
| cat8Δ                                               | ADR1 <sup>c</sup>  | 15       | 1200      |                                       |
| <b>ADY2</b>                                         |                    |          |           |                                       |
| wt                                                  | ADR1-wt            | 3.9      | 810       | 1.0                                   |
| cat8Δ                                               | ADR1-wt            | 1        | 8         |                                       |
| wt                                                  | ADR1 <sup>c</sup>  | 5.3      | 1500      | 20                                    |
| cat8Δ                                               | ADR1 <sup>c</sup>  | 2.5      | 300       |                                       |
| <b>ATO3</b>                                         |                    |          |           |                                       |
| wt                                                  | ADR1-wt            | 0.85     | 11        | 6.9                                   |
| cat8Δ                                               | ADR1-wt            | 1.0      | 0.78      |                                       |
| wt                                                  | ADR1 <sup>c</sup>  | 0.90     | 11        | 89                                    |
| cat8Δ                                               | ADR1 <sup>c</sup>  | 1.0      | 10        |                                       |
| <b>JEN1</b>                                         |                    |          |           |                                       |
| wt                                                  | ADR1-wt            | 1.7      | 122       | 7.2                                   |
| cat8Δ                                               | ADR1-wt            | 1.0      | 8.8       |                                       |
| wt                                                  | ADR1 <sup>c</sup>  | 1.6      | 150       | 80                                    |
| cat8Δ                                               | ADR1 <sup>c</sup>  | 0.9      | 120       |                                       |
| <b><i>Cat8</i>-, <i>Adr1</i>-dependent</b>          |                    |          |           |                                       |
| <b>ALD4</b>                                         |                    |          |           |                                       |
| wt                                                  | ADR1-wt            | 0.86     | 19        | 46                                    |
| cat8Δ                                               | ADR1-wt            | 1.0      | 8.5       |                                       |
| wt                                                  | ADR1 <sup>c</sup>  | 1.9      | 24        | 190                                   |
| cat8Δ                                               | ADR1 <sup>c</sup>  | 2.8      | 45        |                                       |
| <b>ALP1</b>                                         |                    |          |           |                                       |
| wt                                                  | ADR1-wt            | 1.0      | 21        | 25                                    |
| cat8Δ                                               | ADR1-wt            | 1.0      | 5.1       |                                       |
| wt                                                  | ADR1 <sup>c</sup>  | 1.2      | 22        | 83                                    |
| cat8Δ                                               | ADR1 <sup>c</sup>  | 0.61     | 26        |                                       |
| <b>CIT3</b>                                         |                    |          |           |                                       |
| wt                                                  | ADR1-wt            | 0.94     | 15        | 27                                    |
| cat8Δ                                               | ADR1-wt            | 1.0      | 4.1       |                                       |

|                                         |                   |              |      |     |
|-----------------------------------------|-------------------|--------------|------|-----|
| wt                                      | ADR1 <sup>c</sup> | 1.1          | 19   | 79  |
| cat8Δ                                   | ADR1 <sup>c</sup> | 0.79         | 15   |     |
|                                         |                   | <b>CYB2</b>  |      |     |
| wt                                      | ADR1-wt           | 1.0          | 8.3  | 25  |
| cat8Δ                                   | ADR1-wt           | 1.0          | 6.2  |     |
| wt                                      | ADR1 <sup>c</sup> | 1.3          | 7.3  | 61  |
| cat8Δ                                   | ADR1 <sup>c</sup> | 0.96         | 12   |     |
| <b>Cat8-independent, Adr1-dependent</b> |                   |              |      |     |
|                                         |                   | <b>FDH</b>   |      |     |
| wt                                      | ADR1-wt           | 1            | 7.9  | 14  |
| cat8Δ                                   | ADR1-wt           | 1            | 0.55 |     |
| wt                                      | ADR1 <sup>c</sup> | 1.6          | 57   | 42  |
| cat8Δ                                   | ADR1 <sup>c</sup> | 1            | 24   |     |
|                                         |                   | <b>FOX2</b>  |      |     |
| wt                                      | ADR1-wt           | 1.1          | 8.1  | 33  |
| cat8Δ                                   | ADR1-wt           | 1.0          | 2.7  |     |
| wt                                      | ADR1 <sup>c</sup> | 1            | 10   | 130 |
| cat8Δ                                   | ADR1 <sup>c</sup> | 0.52         | 13   |     |
|                                         |                   | <b>GUT1</b>  |      |     |
| wt                                      | ADR1-wt           | 0.74         | 11   | 42  |
| cat8Δ                                   | ADR1-wt           | 1.00         | 4.9  |     |
| wt                                      | ADR1 <sup>c</sup> | 0.72         | 12   | 150 |
| cat8Δ                                   | ADR1 <sup>c</sup> | 0.69         | 18   |     |
|                                         |                   | <b>ICL2</b>  |      |     |
| wt                                      | ADR1-wt           | 1.3          | 13   | 16  |
| cat8Δ                                   | ADR1-wt           | 1.0          | 2.1  |     |
| wt                                      | ADR1 <sup>c</sup> | 0.88         | 14   | 48  |
| cat8Δ                                   | ADR1 <sup>c</sup> | 0.22         | 6.8  |     |
|                                         |                   | <b>POT1</b>  |      |     |
| wt                                      | ADR1-wt           | 1.1          | 11   | 140 |
| cat8Δ                                   | ADR1-wt           | 1.0          | 16   |     |
| wt                                      | ADR1 <sup>c</sup> | 1.6          | 14   | 340 |
| cat8Δ                                   | ADR1 <sup>c</sup> | 1.4          | 53   |     |
|                                         |                   | <b>POX1</b>  |      |     |
| wt                                      | ADR1-wt           | 1            | 100  | 15  |
| cat8Δ                                   | ADR1-wt           | 1            | 15   |     |
| wt                                      | ADR1 <sup>c</sup> | 14           | 210  | 81  |
| cat8Δ                                   | ADR1 <sup>c</sup> | 11           | 170  |     |
|                                         |                   | <b>SPG1</b>  |      |     |
| wt                                      | ADR1-wt           | 2.7          | 9.0  | 110 |
| cat8Δ                                   | ADR1-wt           | 1.0          | 10   |     |
| wt                                      | ADR1 <sup>c</sup> | 1.9          | 45   | 210 |
| cat8Δ                                   | ADR1 <sup>c</sup> | 2.8          | 96   |     |
|                                         |                   | <b>SPS19</b> |      |     |

|                                           |                   |                |      |     |
|-------------------------------------------|-------------------|----------------|------|-----|
| wt                                        | ADR1-wt           | 1.9            | 13   | 38  |
| cat8Δ                                     | ADR1-wt           | 1.0            | 5.1  |     |
| wt                                        | ADR1 <sup>c</sup> | 4.5            | 21   | 130 |
| cat8Δ                                     | ADR1 <sup>c</sup> | 3.2            | 27   |     |
|                                           |                   | <b>YIL057c</b> |      |     |
| wt                                        | ADR1-wt           | 1.6            | 2400 | 23  |
| cat8Δ                                     | ADR1-wt           | 1.0            | 560  |     |
| wt                                        | ADR1 <sup>c</sup> | 2.8            | 1500 | 73  |
| cat8Δ                                     | ADR1 <sup>c</sup> | 1.5            | 1100 |     |
| <b>Cat8-dependent, Adr1-independent</b>   |                   |                |      |     |
|                                           |                   | <b>FBP1</b>    |      |     |
| wt                                        | ADR1-wt           | 2.4            | 330  | 3.7 |
| cat8Δ                                     | ADR1-wt           | 1.0            | 12   |     |
| wt                                        | ADR1 <sup>c</sup> | 1.7            | 160  | 10  |
| cat8Δ                                     | ADR1 <sup>c</sup> | 0.24           | 16   |     |
|                                           |                   | <b>ICL1</b>    |      |     |
| wt                                        | ADR1-wt           | 2              | 150  | 4   |
| cat8Δ                                     | ADR1-wt           | 1              | 6    |     |
| wt                                        | ADR1 <sup>c</sup> | 1              | 95   | 3.9 |
| cat8Δ                                     | ADR1 <sup>c</sup> | 0.20           | 4    |     |
|                                           |                   | <b>MDH2</b>    |      |     |
| wt                                        | ADR1-wt           | 1              | 110  | 4.3 |
| cat8Δ                                     | ADR1-wt           | 1              | 4.7  |     |
| wt                                        | ADR1 <sup>c</sup> | 1.2            | 90   | 9.8 |
| cat8Δ                                     | ADR1 <sup>c</sup> | 1.2            | 8.8  |     |
| <b>Cat8-independent, Adr1-independent</b> |                   |                |      |     |
|                                           |                   | <b>ADR1</b>    |      |     |
| wt                                        | ADR1-wt           | 1.5            | 5.4  | 43  |
| cat8Δ                                     | ADR1-wt           | 1.0            | 2.3  |     |
| wt                                        | ADR1 <sup>c</sup> | 0.7            | 3.7  | 89  |
| cat8Δ                                     | ADR1 <sup>c</sup> | 0.9            | 3.3  |     |

\* mRNA levels normalized to ACT1 and expressed relative to wild-type ADR1 in repressed CKY23 (adr1cat8) with wild type Adr1 activator.

\*\* Gene expression was considered directly dependent on Adr1 and Cat8 if both factors bound to the respective promoters in a genome wide ChIP-chip study (1).



## REFERENCES

1. **Tachibana, C., J. Y. Yoo, J. B. Tagne, N. Kacherovsky, T. I. Lee, and E. T. Young.** 2005. Combined global localization analysis and transcriptome data identify genes that are directly coregulated by Adr1 and Cat8. *Mol Cell Biol* **25**:2138-2146.
